# Supplementary material
Source: Royal Society of Chemistry journal article supplement (doi:10.1039/d6cy00150e)
Supplement: d6cy00150e1.pdf [file d6cy00150e1.pdf]

1 **Supplementary Materials to:**

2 **3D-printed flow-mode atmospheric pressure glow discharge reactor**  
3 **for the synthesis of multi-metallic Pt-/ Pd-/ Os-/ Ru-/ Re-/ W-/ Cr-/**  
4 **nanocluster catalysts**

5 Angelika Nowak<sup>a\*</sup>, Piotr Jamroz<sup>a</sup>, Mateusz M. Marzec<sup>b</sup>, Krystian Sokolowski<sup>b</sup>, Anna  
6 Dzimitrowicz<sup>a</sup>, Paweł Pohl<sup>a</sup>, Andrzej Bernasik<sup>b,c</sup>, Piotr Cyganowski<sup>d\*</sup>

7 <sup>a</sup>*Department of Analytical Chemistry and Chemical Metallurgy, Wrocław University of Science and Technology,*  
8 *Wybrzeże St. Wyspiańskiego 27, 50-370 Wrocław, Poland*

9 <sup>b</sup>*Academic Centre for Materials and Nanotechnology, AGH University of Krakow, A. Mickiewicza 30, 30-059 Krakow,*  
10 *Poland*

11 <sup>c</sup>*Faculty of Physics and Applied Computer Science, AGH University of Krakow, A. Mickiewicza 30, 30-059 Krakow,*  
12 *Poland*

13 <sup>d</sup>*Department of Process Engineering and Technology of Polymer and Carbon Materials, Wrocław University of*  
14 *Science and Technology, Wybrzeże St. Wyspiańskiego 27, 50-370 Wrocław, Poland*

15

16

17 \*Corresponding authors: Angelika Nowak ([angelika.nowak@pwr.edu.pl](mailto:angelika.nowak@pwr.edu.pl)) and Piotr Cyganowski  
18 ([piotr.cyganowski@pwr.edu.pl](mailto:piotr.cyganowski@pwr.edu.pl))

19

20

## 21 S1. Detailed Methods and Materials

### 22 S1.1 Plasma reactor design

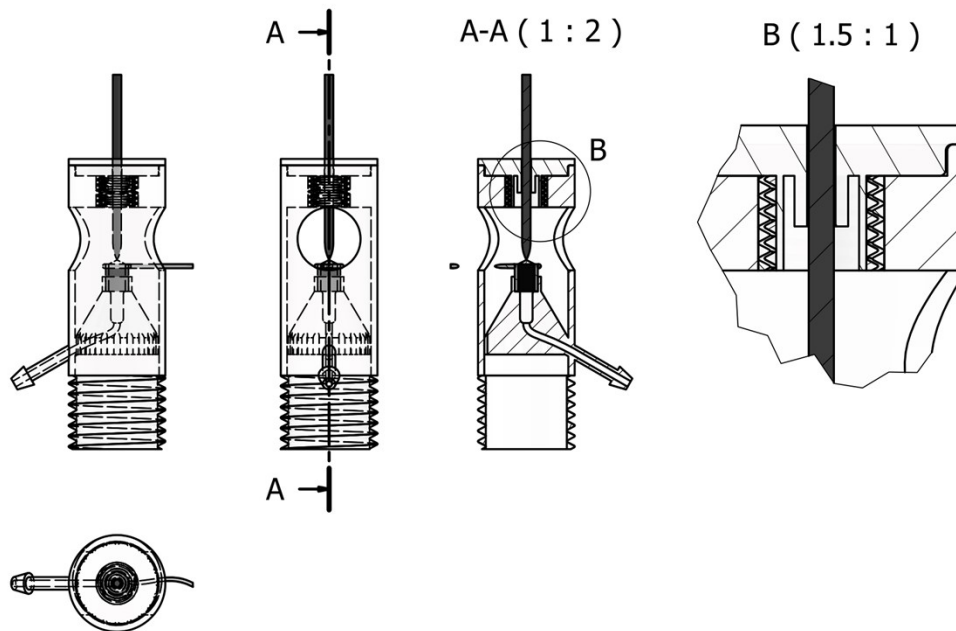

23

24 **Figure S1.** Technical presentation of the applied CAPP system.

25

26

27

28

29

30

31 **Table S1.** Current-voltage parameters used for nanocluster catalysts (NCs) synthesis by flowing liquid  
 32 anode direct-current atmospheric pressure glow discharge (FLA-dc-APGD) and flowing liquid cathode  
 33 direct-current atmospheric pressure glow discharge (FLC-dc-APGD).

| Synthesized NCs     | FLA-dc-APGD |              | FLC-dc-APGD |              |
|---------------------|-------------|--------------|-------------|--------------|
|                     | Voltage [V] | Current [mA] | Voltage [V] | Current [mA] |
| Pt <sup>Os</sup>    | 1230        | 40           | 1150        | 46           |
| Os <sup>Pd/Cr</sup> | 1360        | 55           | 1160        | 58           |
| Ru <sup>W</sup>     | 1350        | 52           | 1110        | 46           |
| W <sup>Ru/Os</sup>  | -*          | -*           | 1110        | 46           |
| Re <sup>Os</sup>    | 1300        | 46           | -*          | -*           |

34 \*The plasma was unstable, therefore the synthesis was not performed

## 35 S1.2 Reagents and solutions

36 The reagents used for the NCs synthesis containing Os(IV), Ru(III), Re(VII), W(VI), and Cr(VI)  
 37 solutions were obtained from Sigma Aldrich (USA), while for Pt(IV), and Pd(II) from Innovator  
 38 (Poland). The precursor solution of 1000 mg L<sup>-1</sup> Pt(IV) ions stock solution was prepared from  
 39 H<sub>2</sub>PtCl<sub>6</sub> (30% solution). The ruthenium precursor solution was a 1000 mg L<sup>-1</sup> stock solution of  
 40 Ru(III) ions, prepared using RuCl<sub>3</sub>, while (NH<sub>4</sub>)<sub>2</sub>OsCl<sub>6</sub> and Na<sub>2</sub>WO<sub>4</sub>•2H<sub>2</sub>O reagent were used to  
 41 1000 mg L<sup>-1</sup> Os(IV) and 1000 mg L<sup>-1</sup> W(VI), respectively ions stock solution preparation.  
 42 Moreover 1000 mg L<sup>-1</sup> Re(VII) solution was prepared using NH<sub>4</sub>ReO<sub>4</sub> and 1000 mg L<sup>-1</sup> Pd(II)  
 43 solution using H<sub>2</sub>PdCl<sub>4</sub>. The potassium dichromate (K<sub>2</sub>Cr<sub>2</sub>O<sub>7</sub>) solution of 1000 mg L<sup>-1</sup> Cr(VI) was  
 44 also prepared. Sodium tetrahydroborate (THB) and 4-nitrophenol (4-NP) for catalytic activity  
 45 analysis were acquired from Sigma-Aldrich (USA). These solutions were freshly prepared in  
 46 water.

## 47 S1.3 Characterization of NCs

48 The size distribution, hydrodynamic diameter (D<sub>h</sub>) and polydispersity index (PDI) of NCs  
 49 synthesized by FLA-dc-APGD and FLC-dc-APGD were evaluated using dynamic light scattering  
 50 (DLS) at temperature of 20°C. Samples were measured in 1-cm polystyrene cuvette. Zeta potential  
 51 (ξ) and conductivity (σ) of the NCs synthesized by FLA-dc-APGD and FLC-dc-APGD were

52 examined by electrophoretic light scattering (ELS), to assess samples stability, focusing on  
53 aggregation and changes in surface charge. Ru<sup>W</sup>NCs synthesized by FLA-dc-APGD and FLC-dc-  
54 APGD were diluted tenfold prior to measurements. The evaluation was taken in polycarbonate  
55 Omega cuvette at temperature of 25°C. A Litesizer 500 device (Anton Paar GmbH, Austria) was  
56 utilized for this purpose, while the obtained data were analyzed using Kalliope software (Anton  
57 Paar, Austria).

58 The concentrations of metals in NCs catalysts were determined using inductively coupled  
59 plasma optical emission spectrometry (ICP-OES) using an Agilent 5110 instrument. The optical  
60 characteristics of the NCs synthesized by FLA-dc-APGD and FLC-dc-APGD techniques were  
61 evaluated through UV/Vis absorption spectrophotometry utilizing the SPECORD 210 PLUS  
62 spectrophotometer (Analytik Jena, Jena AG, Germany). Absorption spectra were recorded across  
63 the wavelength range of 190 to 1100 nm with a spectral resolution of 1 nm using 1-cm quartz  
64 cuvette.

65 The structural characterization of NCs was performed using a TITAN<sup>3</sup> G<sup>2</sup> 60-300 high-  
66 resolution transmission electron microscope HRTEM (FEI Company, now Thermo Fisher  
67 Scientific) with selected area electron diffraction (SAED), energy-dispersive X-ray spectroscopy  
68 (EDX) and a high-angle annular dark-field (HAADF) detector. The resulting NCs solutions were  
69 placed onto Cu grids (100 mesh, Agar Scientific Ltd., Stansted, Great Britain) and evaporated in  
70 air atmosphere. High-resolution TEM images were analyzed using ImageJ 1.54 (National Institutes  
71 of Health, Bethesda, MD, USA) software to create histograms representing the average size  
72 distribution of observed nanoclusters.

### 73 **S1.4 Catalytic activity studies**

74 The study of the catalytic activity of the obtained NCs, synthesized by using dc-APGD was based  
75 on the model reaction with 4-NP. Reaction with 4-NP evaluate the catalytic performance of the  
76 NCs, moving in the direction of 4-aminophenol (4-AP) formation, with a catalyst being necessary  
77 for the reaction to proceed. UV-Vis measurements (Specord 210 Plus, Analytik Jena, Germany)  
78 in a 3 mL quartz cuvette were used to monitor NCs catalytic activity. The measurement procedure  
79 was performed by recording the spectrum of 2.5 mL of a 4-NP solution (0.1 mmol L<sup>-1</sup>). The  
80 spectrum revealed a distinct absorption band of 4-NP at  $\lambda_{\text{max}} = 318$  nm. Adding 0.3 mL of a NaBH<sub>4</sub>

81 solution (0.1 mol L<sup>-1</sup>) to measured 4-NP moved the absorption band to  $\lambda_{\max} = 400$  nm, indicating  
82 the production of the 4-nitrophenolate anion <sup>1</sup>. Finally, 0.1 mL or 0.01 mL of the suspension of  
83 NCs in depending of the sample was added to the cuvette, and the spectra in the 200-600 nm  
84 spectra range were recorded. Afterwards, the change in absorbance at 400 nm occurred because of  
85 the initiation and continuation of the reduction from 4-NP to 4-AP. The obtained absorbances were  
86 then utilized to simulate the pseudo-first order kinetics of the reaction. Therefore the experiment  
87 was set in such a way that there was a significant excess of NaBH<sub>4</sub> in the reaction. According to  
88 the Lambert-Beer law, it was thought that the ratio of NCs concentrations equals the ratio of their  
89 absorbances. Based on the proportionality between concentration and absorbance for the 4-  
90 nitrophenolate anion, a plot of  $-\ln(A_t/A_0)$  versus time (t) was generated, with A<sub>t</sub> being the  
91 absorbance at time t and A<sub>0</sub> the absorbance at the start of the reaction. The pseudo-first order rate  
92 constant ( $k_1^b$  in min<sup>-1</sup>) and mass normalized rate constant ( $k_{1m}^b$  in min<sup>-1</sup>mg<sup>-1</sup>) were calculated from  
93 the slopes of the resulting plots.

94 To evaluate the efficiency of the catalyst in promoting the conversion of 4-NP to 4-AP,  
95 turnover frequency (TOF) which represents the changing conversion percentage (%) of 4-NP over  
96 time was calculated, as described Khan et al. <sup>1</sup>. To assess the molar activity of the Pt<sup>0s</sup>NCs,  
97 Os<sup>Pd/Cr</sup>NCs, Ru<sup>W</sup>NCs, W<sup>Ru/Os</sup>NCs, and Re<sup>Os</sup>NCs TOFs parameter values were calculated utilizing  
98 equation (S1):

$$99 \quad TOF = n_{4-NP} * r * n_{NCs}^{-1} * t^{-1} \quad (S1)$$

100 where  $n_{4-NP}$  and  $n_{NCs}$  represent the number of moles of 4-NP and NCs, respectively, whereas t  
101 stands for the reaction time (in mins), and r corresponds to the yield (%) of the reduction process.

## 102 **S1.5 XPS analysis**

103 X-ray Photoelectron Spectroscopy (XPS) analyses were conducted using a PHI VersaProbe II  
104 Scanning XPS system equipped with a monochromatic Al K $\alpha$  radiation source ( $h\nu = 1486.6$  eV).  
105 The X-ray beam was focused to a 100  $\mu\text{m}$  spot and rastered over a 400  $\times$  400  $\mu\text{m}^2$  area to ensure  
106 representative sampling. Spectra were collected at a photoelectron take-off angle of 45° with a  
107 pass energy of 46.95 eV and an energy step size of 0.1 eV, providing high-resolution data for the  
108 analyzed core levels regions. A dual-beam charge neutralization system, combining 7 eV Ar<sup>+</sup> ions  
109 and 1 eV electrons, was employed to stabilize the surface potential during measurements. All

110 binding energies were calibrated against the C-C component of the C 1s peak at 285.0 eV. The  
111 pressure in the analysis chamber was maintained below  $4 \times 10^{-9}$  mbar throughout the  
112 measurements. Peak fitting and quantitative analysis were performed using PHI MultiPak software  
113 (version 9.9.3). High-resolution XPS spectra were fitted using mixed Gaussian–Lorentzian line  
114 shapes (with the Lorentzian contribution limited to 25%), following background subtraction using  
115 the Shirley method. For spin–orbit split components (p, d, and f), the peak area ratios were  
116 constrained to the theoretical values of 2:1, 3:2, and 4:3, respectively, while the energy separations  
117 were fixed according to reference data. The full width at half maximum (FWHM) values were  
118 maintained within physically reasonable and consistent ranges for analogous spectral components,  
119 except where chemical state dependent broadening or narrowing was expected. Based on the  
120 instrument geometry, the information depth of the measurements was estimated to be  
121 approximately 5 nm. For the XPS analysis, the solutions containing Pt<sup>Os</sup>NCs, Os<sup>Pd/Cr</sup>NCs,  
122 Ru<sup>W</sup>NCs, W<sup>Ru/Os</sup>NCs, and Re<sup>Os</sup>NCs were repeatedly drop-cast and evaporated onto silicon wafer  
123 substrates.

## 124 **S2. Detailed Results and Discussion**

### 125 **S2.1 NCs characteristic**

126 The size by number results (Figure 2) indicate a variation in particle diameter as a  
127 consequence of cold atmospheric pressure plasma (CAPP) treatment. In the case of Pt, the  
128 application of FLA-dc-APGD and FLC-dc-APGD resulted in formation of Pt<sup>Os</sup>NCs with average  
129 particle diameter of  $190.0 \pm 2.9$  nm and  $320.0 \pm 4.7$  nm, respectively. Conversely, Os<sup>Pd/Cr</sup>NCs  
130 exhibited a significantly larger average particle diameter of  $3017.7 \pm 74.9$  nm following FLA-dc-  
131 APGD and further to  $131.2 \pm 2.1$  nm after FLC-dc-APGD treatment. In the case of Ru<sup>W</sup>NCs, the  
132 response to plasma treatment with FLA-dc-APGD resulting in  $275.9 \pm 4.1$  nm, and in case of FLC-  
133 dc-APGD it was  $1416.0 \pm 42.3$  nm. For Re<sup>Os</sup>NCs, the particle size was  $134.1 \pm 3.4$  nm after FLA-  
134 dc-APGD treatment, and  $110.7 \pm 2.8$  nm for W<sup>Ru/Os</sup>NCs upon application of FLC-dc-APGD. A  
135 notable increment in average particle size distribution indicates that, upon exiting the plasma zone,  
136 individual particles tend to form larger agglomerates, which are subsequently detected and  
137 classified as larger particles by DLS device <sup>2</sup>. Particles within the plasma phase undergo  
138 interactions with dc-APGD derived reactive species. In non-thermal plasmas, the high electron

139 temperature and mobility lead to a predominance of electron-particle collisions. This results in the  
140 accumulation of negative charge on the particle surfaces, which effectively suppresses particle  
141 agglomeration. The selective plasma heating, driven predominantly by the recombination of ions  
142 or radicals at the particle surface, leads to a particle temperature exceeding that of the ambient  
143 plasma gas, facilitating crystallization processes <sup>3</sup>. As reported by Cui et al. <sup>4</sup>, platinum  
144 nanoparticles (PtNPs) with particle size down to 2 nm can be synthesized by microwave discharge  
145 plasma, which contrasts with the values obtained in this study. However, there is currently a lack  
146 of published studies focusing on the synthesis of OsNCs by CAPP, highlighting a significant gap  
147 in the existing nanomaterials research. Nonetheless, literature reports information about OsNPs  
148 synthesis by irradiation with electrons, yielding particles with a size ranging of 1.5 to 50 nm <sup>5</sup>.  
149 Following this, RuNPs synthesized by glow discharge <sup>6</sup> can be characterized by a narrow size  
150 distribution within the 1-2 nm range. Similarly, Müller et al. <sup>2</sup> reported substantially smaller  
151 particle sizes for WNPs, with diameters as low as 12 nm obtained by a radio-frequency (rf)  
152 dielectric barrier discharge in form of plasma jet. Such variations between literature and our  
153 research may be attributed to differences in synthesis conditions such as a precursor chemical  
154 compound and concentration, plasma type and process parameters.

155         Optical properties of NCs synthesized by CAPP were investigated by UV/Vis absorption  
156 spectrophotometry. As shown in Figure S1, the UV/Vis spectra of Pt<sup>Os</sup>NCs, Os<sup>Pd/Cr</sup>NCs, and  
157 Ru<sup>W</sup>NCs synthesized by FLA-dc-APGD and FLC-dc-APGD remain relatively unchanged. The  
158 only evident difference is the increased absorbance values for the Pt<sup>Os</sup>NCs and Os<sup>Pd/Cr</sup>NCs  
159 synthesized by FLA-dc-APGD in comparison to those obtained by FLC-dc-APGD.

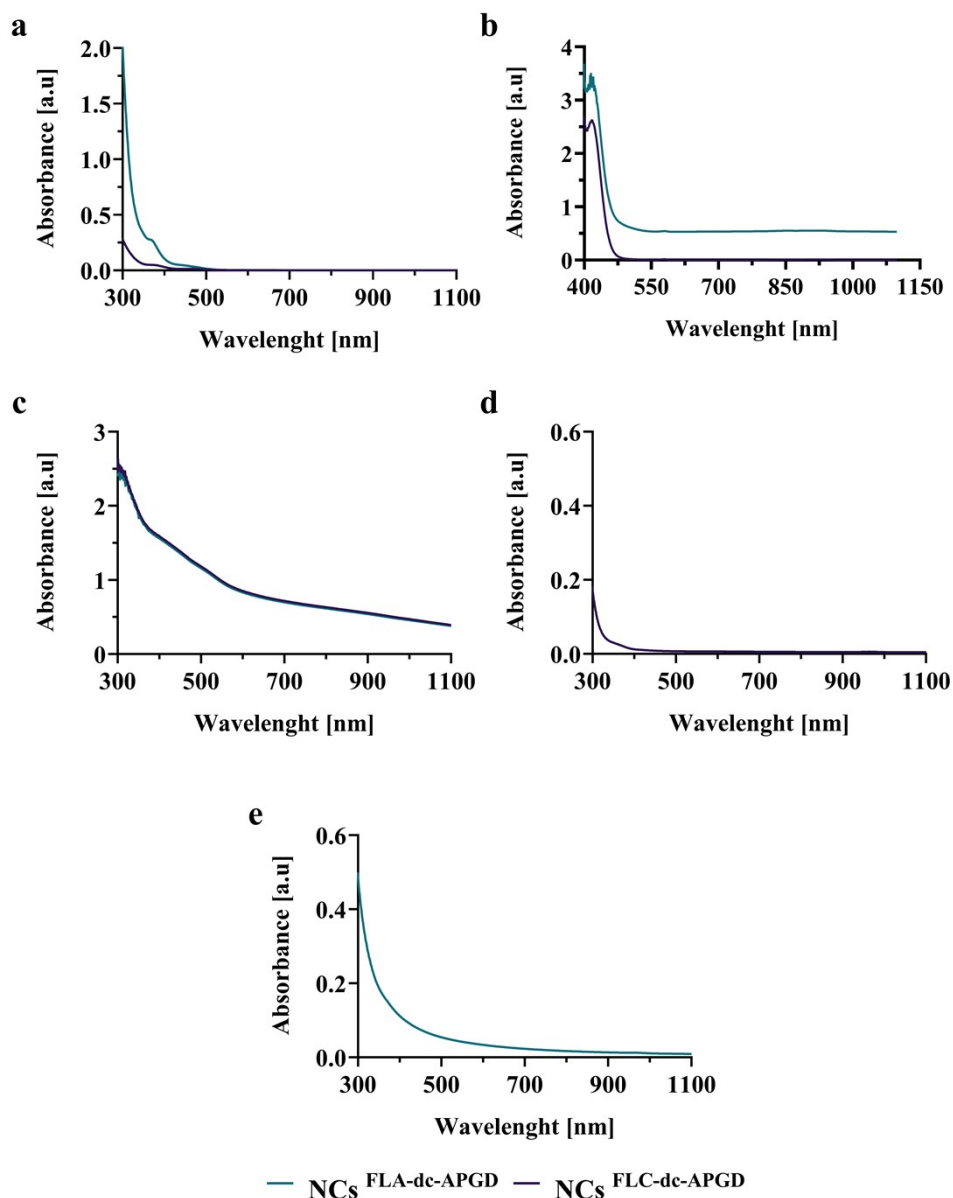

160

161 **Figure S2.** The UV/Vis spectra for NCs synthesized by FLA-dc-APGD and FLC-dc-APGD for Pt<sup>Os</sup>NCs  
 162 (a), Os<sup>Pd/Cr</sup>NCs (b), Ru<sup>W</sup>NCs (c), W<sup>Ru/Os</sup>NCs (d), and Re<sup>Os</sup>NCs (e), where, exceptionally, the Ru<sup>W</sup>NCs  
 163 analysis was conducted on solutions diluted 10 times.

164         The assessed PDI value of the analyzed NCs suggest uniform size distribution (see Table  
 165 S2), with the most close monodisperse population observed for Os<sup>Pd/Cr</sup>NCs synthesized by FLA-  
 166 dc-APGD. As it was observed before NPs of varying sizes and/or velocities can exhibit different  
 167 probabilities of becoming charged by the CAPP<sup>7</sup>. Additionally, in nonstationary plasmas, bipolar  
 168 charge distributions can lead to attractive Coulomb forces that enhances coagulation process<sup>8</sup>, and

169 therefore resulting in a broader size distribution. In addition, the spherical morphology of NPs can  
 170 be achieved through the addition of stabilizing agent <sup>9</sup>. Data regarding the PDI of NPs synthesized  
 171 by CAPP are not reported in the available literature, however PDI values for NPs obtained through  
 172 alternative synthesis methods are documented. Previous studies have demonstrated that highly  
 173 monodisperse laser-generated PtNPs with a PDI of 0.05 can be achieved by using downstream  
 174 centrifugation <sup>10</sup>. Additionally, a PDI=0.18 has been reported for PtNPs synthesized using plant-  
 175 based analytes present in the extract of *Sechium edule* <sup>11</sup>. Unfortunately, no PDI values for OsNPs  
 176 have been provide. El-Sayed et al. <sup>12</sup> demonstrated a PDI value for imidazolium ionic liquid coated  
 177 RuNPs implies uniformity in NPs size (PDI=0.23), suggesting efficient control over the synthesis  
 178 process. For WO<sub>3</sub> NPs, a PDI of 0.22 can be achieved through biogenic synthesis employing the  
 179 Taguchi method <sup>13</sup>. Details regarding D<sub>h</sub> values can be found in the Table S2.

180 **Table S2.** Polydispersity index (PDI) and mean hydrodynamic diameter (D<sub>h</sub>) of NCs synthesized by FLA-  
 181 dc-APGD and FLC-dc-APGD.

| Sample                  | NCs synthesized by<br>FLA-dc-APGD |                     | NCs synthesized by<br>FLC-dc-APGD |                     |
|-------------------------|-----------------------------------|---------------------|-----------------------------------|---------------------|
|                         | PdI [%]                           | D <sub>h</sub> [nm] | PdI [%]                           | D <sub>h</sub> [nm] |
| Pt <sup>Os</sup> NCs    | 24.0                              | 1921.4              | 28.3                              | 608.3               |
| Os <sup>Pd/Cr</sup> NCs | 16.3                              | 3547.1              | 29.6                              | 647.3               |
| Ru <sup>W</sup> NCs     | 31.8                              | 2599.2              | 27.7                              | 3189.3              |
| WRu/OsNCs               | -*                                | -*                  | 21.6                              | 271.1               |
| Re <sup>Os</sup> NCs    | 23.7                              | 174.4               | -*                                | -*                  |

182 \*The synthesis was not performed in this study

183 NCs stability is determined by the  $\xi$  value, as it indicates the extent of interparticle  
 184 electrostatic repulsion <sup>14</sup>. The measured  $\xi$  (Table 1) for the Pt<sup>Os</sup>NCs and Os<sup>Pd/Cr</sup>NCs synthesized  
 185 by FLA-dc-APGD and FLC-dc-APGD suggest colloidal instability. In contrast, the Ru<sup>W</sup>NCs,  
 186 WRu/OsNCs, and Re<sup>Os</sup>NCs indicated improved dispersion stability. This was evidenced by  $\xi$  values  
 187 approaching  $\pm 30$  mV, a range typically associated with sufficient electrostatic repulsion to prevent  
 188 particle aggregation <sup>15</sup>. Throughout the CAPP treatment, plasma-generated ions are directed  
 189 toward the substrate surface, initiating bombardment that triggers a range of surface-related  
 190 modifications. An example of this interaction is the formation of hydrophilic functional groups,

191 which is additionally influenced by the characteristics of the treated substrate <sup>16</sup>. Moreover, CAPP  
192 treatment results in the generation of reactive oxygen and nitrogen species (RONS), which modify  
193 the NPs surface also through the introduction of new functional groups. According to findings  
194 presented by Zhao et al. <sup>17</sup>, CAPP treatment time can impact the stability of NPs by modifying  
195 their surface charge. In the case of PtNPs, extension of sample treatment time by plasma jet from  
196 2 to 5 mins resulted in a  $\xi$  change from -56.0 mV to -12.5 mV <sup>17</sup>. A review of the available literature  
197 reveals a lack of reported  $\xi$  for OsNCs and RuNCs synthesized by CAPP. An example involving  
198 WNP includes  $\text{WO}_3$  synthesized by underwater impulse discharge, which demonstrate a zeta  
199 potential of approximately -30 mV <sup>18</sup>.

200         The differences in  $\sigma$  arise from the application of CAPP as well as from the precursors  
201 employed. Specifically, change in conductivity value can be attributed to the presence of RONS  
202 generated within the plasma environment <sup>19</sup>. These reactive species are known to interact with the  
203 surface, potentially inducing surface modifications <sup>20</sup>, thereby resulting in improved electrical  
204 conductivity of NCs.

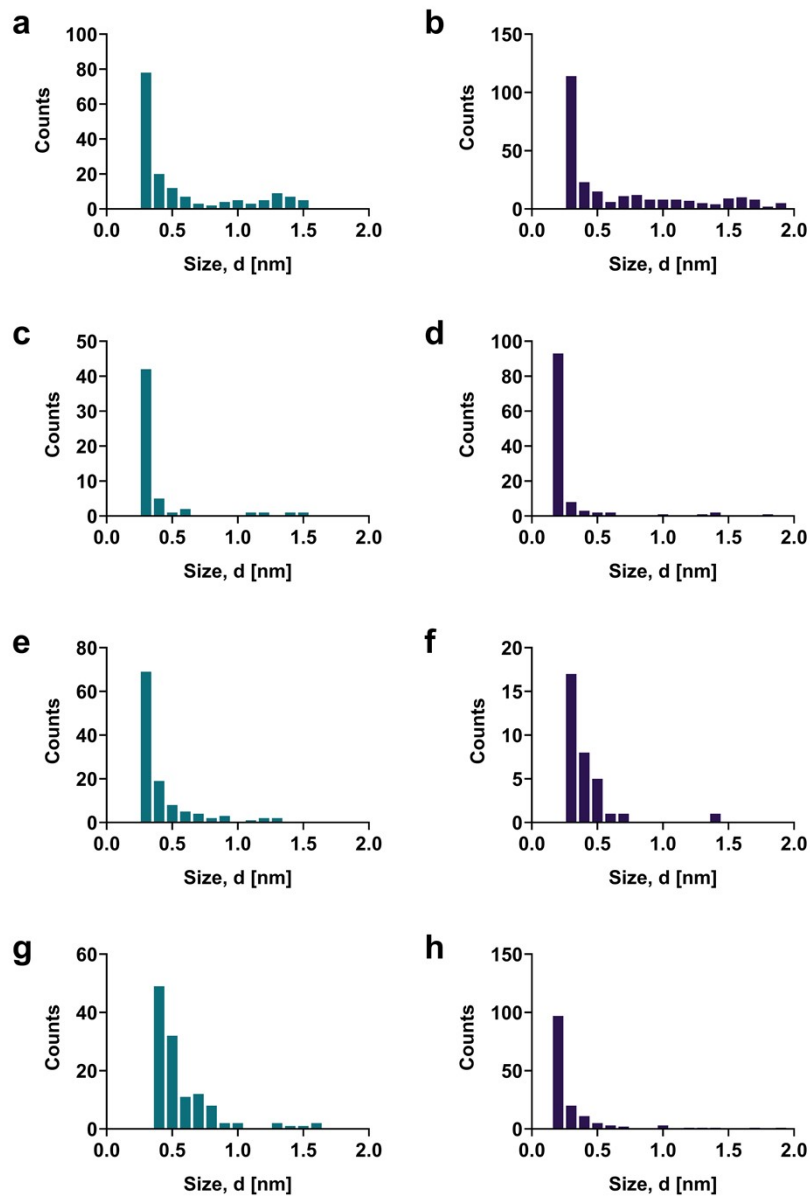

205

206 **Figure S3.** Size distribution from HRTEM of  $\text{Pt}^{\text{Os}}\text{NCs}^{\text{FLA-dc-APGD}}$  (a),  $\text{Pt}^{\text{Os}}\text{NCs}^{\text{FLC-dc-APGD}}$  (b),  
 207  $\text{Os}^{\text{Pd/Cr}}\text{NCs}^{\text{FLA-dc-APGD}}$  (c),  $\text{Os}^{\text{Pd/Cr}}\text{NCs}^{\text{FLC-dc-APGD}}$  (d),  $\text{Ru}^{\text{W}}\text{NCs}^{\text{FLA-dc-APGD}}$  (e),  $\text{Ru}^{\text{W}}\text{NCs}^{\text{FLC-dc-APGD}}$   
 208 (f), and  $\text{Re}^{\text{Os}}\text{NCs}^{\text{FLA-dc-APGD}}$  (g), and  $\text{W}^{\text{Ru/Os}}\text{NCs}^{\text{FLC-dc-APGD}}$  (h).

209 **Table S3.** ICP-OES results related to the NC catalysts. Mean element concentrations (in mg L<sup>-1</sup>) with standard deviations (n=3)

210

| <b>Sample</b>                      | <b>Os</b> | <b>Pd</b>   | <b>Pt</b> | <b>Re</b> | <b>Ru</b> | <b>W</b>   | <b>Cr</b> |
|------------------------------------|-----------|-------------|-----------|-----------|-----------|------------|-----------|
| <b>Pt<sup>Os</sup>NCs (FLC)</b>    | 1,2±0,4   | <2,2        | 58,4±0,4  | <1,5      | <0,5      | <1,3       | <0,5      |
| <b>Ru<sup>W</sup>NCs (FLC)</b>     | <0,5      | <2,2        | <1,1      | <1,5      | 392,7±7,9 | 6,9±1,1    | <0,5      |
| <b>Ru<sup>W</sup>NCs (FLA)</b>     | <0,5      | <2,2        | <1,1      | <1,5      | 369,8±1,7 | 6,0±0,2    | <0,5      |
| <b>W<sup>Ru/Os</sup>NCs (FLC)</b>  | 0,9±0,1   | <2,2        | <1,1      | <1,5      | 9,9±0,1   | 1094,5±6,5 | <0,5      |
| <b>W<sup>Ru/Os</sup>NCs (FLA)</b>  | 4,3±0,1   | <2,2        | <1,1      | 20,4±0,8  | <0,5      | <1,3       | <0,5      |
| <b>Re<sup>Os</sup>NCs (FLC)</b>    | <0,5      | <2,2        | <1,1      | 755,5±3,2 | <0,5      | 2,9±1,2    | <0,5      |
| <b>Re<sup>Os</sup>NCs (FLA)</b>    | 5,3±2,2   | 1292,9±12,2 | <1,1      | <1,5      | <0,5      | <1,3       | <0,5      |
| <b>Pd<sup>Os</sup>NCs (FLC)*</b>   | 0,7±0,1   | 1292,5±4,3  | <1,1      | <1,5      | <0,5      | <1,3       | <0,5      |
| <b>Pd<sup>Os</sup>NCs (FLA)*</b>   | 1,7±0,5   | <2,2        | <1,1      | 708,8±2,4 | <0,5      | 2,4±0,2    | <0,5      |
| <b>Os<sup>Pd/Cr</sup>NCs (FLC)</b> | 454,4±4,2 | 5,5±0,8     | <1,1      | <1,5      | <0,5      | <1,3       | 1,3±0,1   |

\* Sample not included into the manuscript

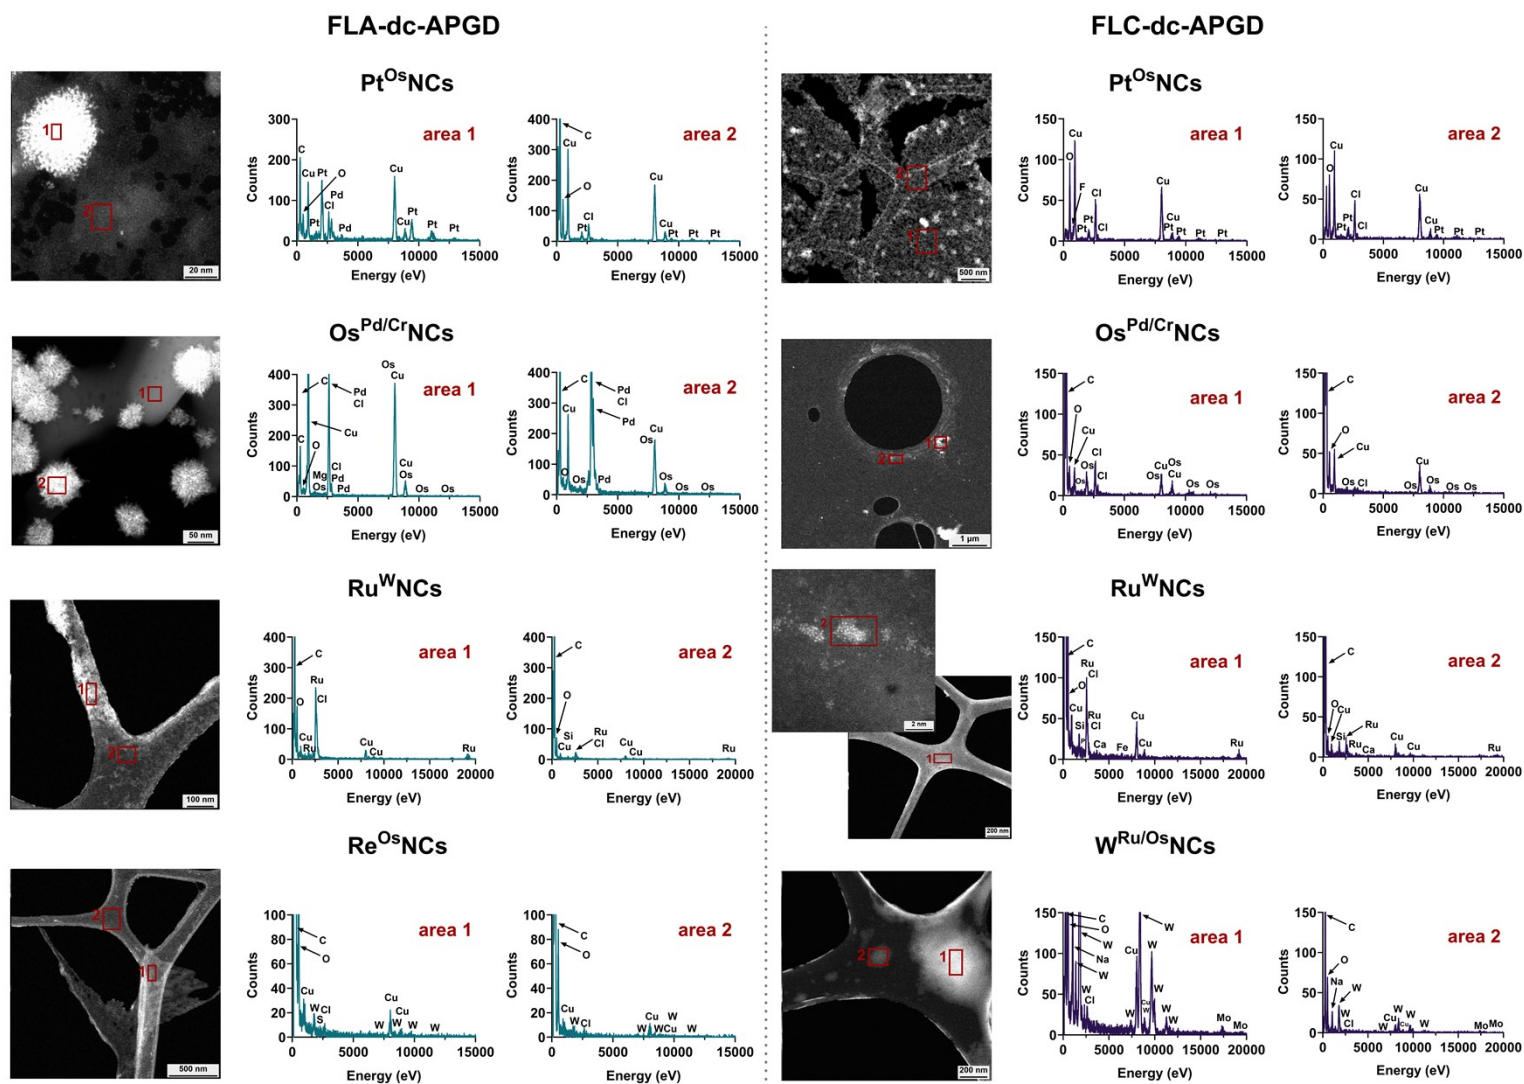

212

213 **Figure S4.** HRTEM photomicrographs and EDX spectra of NCs synthesised by FLA-dc-APGD and FLC-dc-APGD. Each panel presents  
 214 photomicrograph and corresponding EDX spectra of the highlighted HRTEM areas.

## 215 S2.2 Catalytic reaction

216 An initial NCs volume of 100  $\mu\text{L}$  was employed in the experiment. However, in the case of  
217 Ru<sup>W</sup>NCs synthesized by FLA-dc-APGD and FLC-dc-APGD, this volume proved unsuitable due  
218 to the excessively rapid reaction rate (catalyst mass= 0.0638 mg), which resulted in a rapid  
219 flattening of the UV/Vis spectrum at 400 nm and prevented reliable kinetic analysis. Therefore,  
220 additional experiments were conducted using different NCs volumes to identify appropriate  
221 volume that still enabled accurate monitoring of the reaction progress as is presented in Figure S5.  
222 This approach also enabled plotting of a first-order kinetic plot with a linear dependence, allowing  
223 the determination of the reaction rate over the entire measured range. For Ru<sup>W</sup>NCs, a catalyst mass  
224 of 0.000637 mg was applied, as shown in Figure S5, as well as a mass of 0.00637 mg, presented  
225 in Figure 5. The use of the higher catalyst mass resulted in a more uniform first-order kinetic  
226 profile (see Figure 5). Accordingly, finally two distinct NCs volumes (100  $\mu\text{L}$  for Pt<sup>Os</sup>NCs,  
227 Os<sup>Pd/Cr</sup>NCs, W<sup>Ru/Os</sup>NCs, Re<sup>Os</sup>NCs and 10  $\mu\text{L}$  for Ru<sup>W</sup>NCs) were applied, necessitating the  
228 calculation of  $k_{1m}^b$ , which are provided in Table 2.

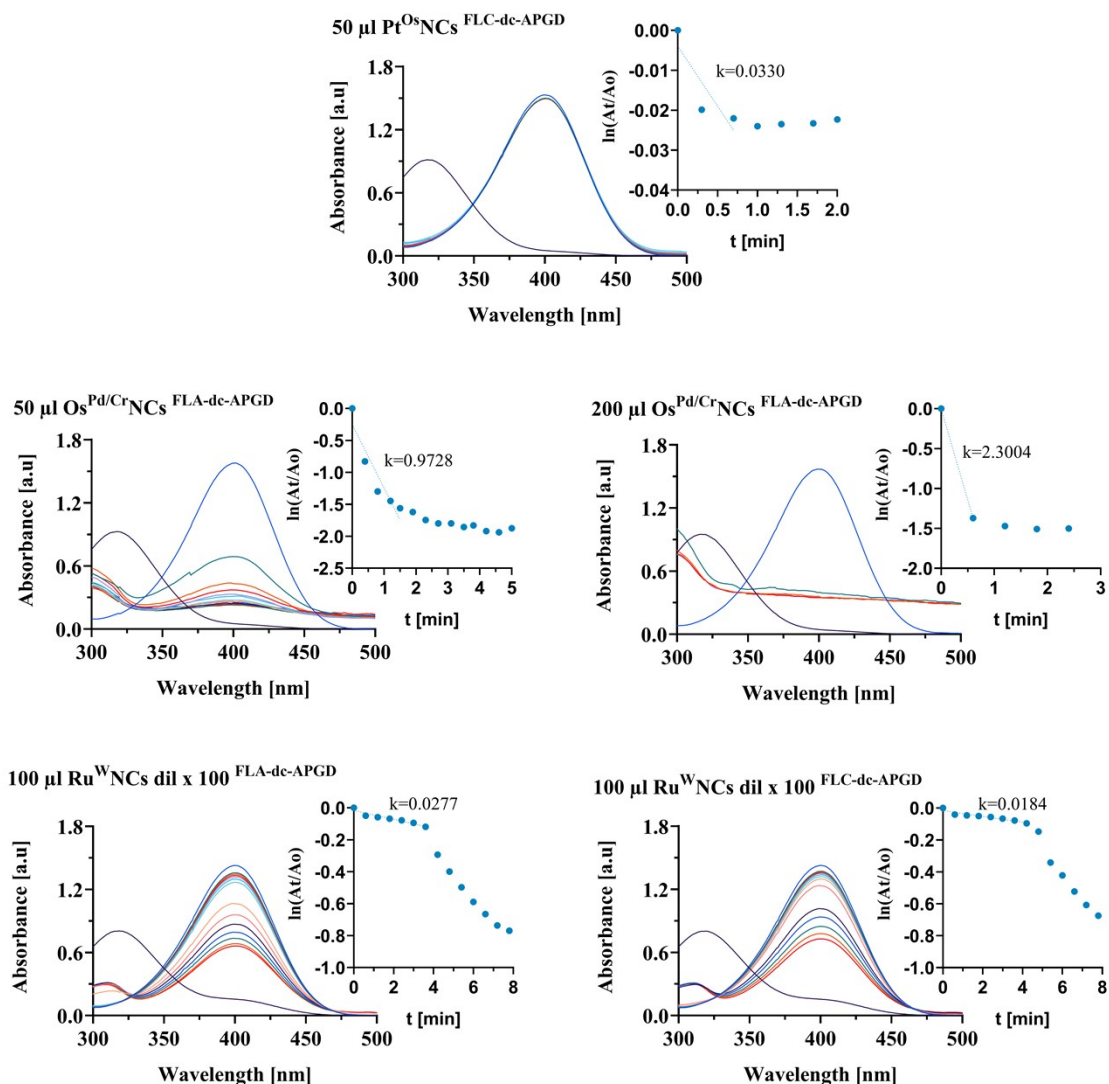

229

230 **Figure S5.** UV/Vis absorption spectra and first-order kinetic plots for the reduction of 4-NP using selected  
 231 NCs synthesised by FLA-dc-APGD or FLC-dc-APGD at different catalyst volumes to determine the  
 232 appropriate catalyst amount.

233 Calculated TOF value represents the number of catalytic reactions occurring per active site  
 234 over time. The values of the TOFs for 20, 40, 60, 80 and 100% 4-NP conversions are displayed in  
 235 Figure S2. The TOF values for all samples exhibited a decline as the extent of reduction  
 236 approached its maximum. The Os<sup>Pd/Cr</sup>NCs and Ru<sup>W</sup>NCs synthesized by FLA-dc-APGD reveal the  
 237 greatest values of TOF of 0.76, and 0.89 min<sup>-1</sup> for 20%, and 0.37, and 0.27 min<sup>-1</sup> for 100% of 4-  
 238 NP conversion, respectively. Conversely, the lowest activities were observed for W<sup>Ru/Os</sup>NCs and  
 239 Re<sup>Os</sup>NCs. It can be observed that the TOF values obtained for NCs synthesized via FLA-dc-APGD

240 were approximately at least two times higher in the case of Pt<sup>Os</sup>NCs, and Os<sup>Pd/Cr</sup>NCs in comparison  
 241 to those NCs synthesized by FLC-dc-APGD. In contrast, for Ru<sup>W</sup>NCs, the TOF values for catalysts  
 242 synthesized by both FLA-dc-APGD and FLC-dc-APGD were almost comparable, for instance, the  
 243 TOF at 100% conversion was 0.27 min<sup>-1</sup> and 0.24 min<sup>-1</sup>, respectively. This suggests a greater  
 244 availability of Os<sup>Pd/Cr</sup>NCs and Ru<sup>W</sup>NCs synthesized by FLA-dc-APGD, what is in pair with  
 245 catalytic activity results (see Table 2).

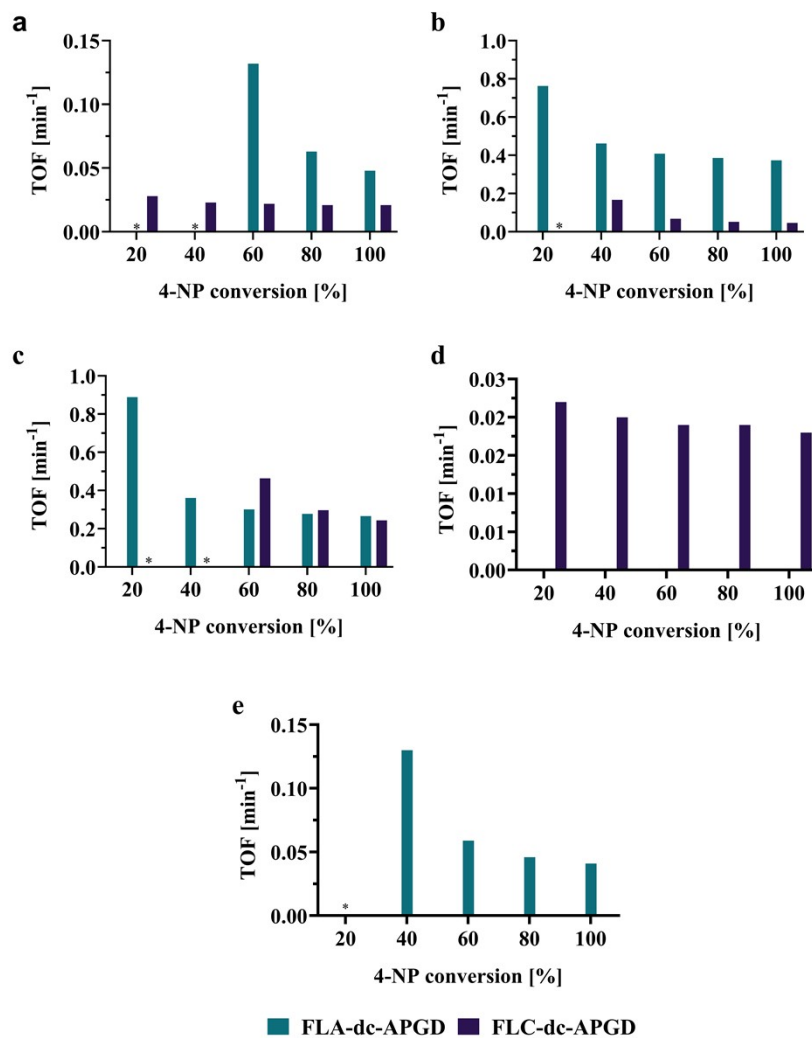

246

247 **Figure S6.** The TOFs for 20, 40, 60, 80%, and 100% 4-NP conversions for NCs synthesized by FLA-dc-  
 248 APGD and FLC-dc-APGD for Pt<sup>Os</sup>NCs (a), Os<sup>Pd/Cr</sup>NCs (b), Ru<sup>W</sup>NCs (c), W<sup>Ru/Os</sup>NCs (d), and Re<sup>Os</sup>NCs (e),  
 249 where \* means that the TOF value can not be determined because after introducing the catalyst into the  
 250 reaction the degree of conversion was already higher than the range assumed in the graph.

251 **S2.3 Oxidation states of d-block elements in NCs morphology**

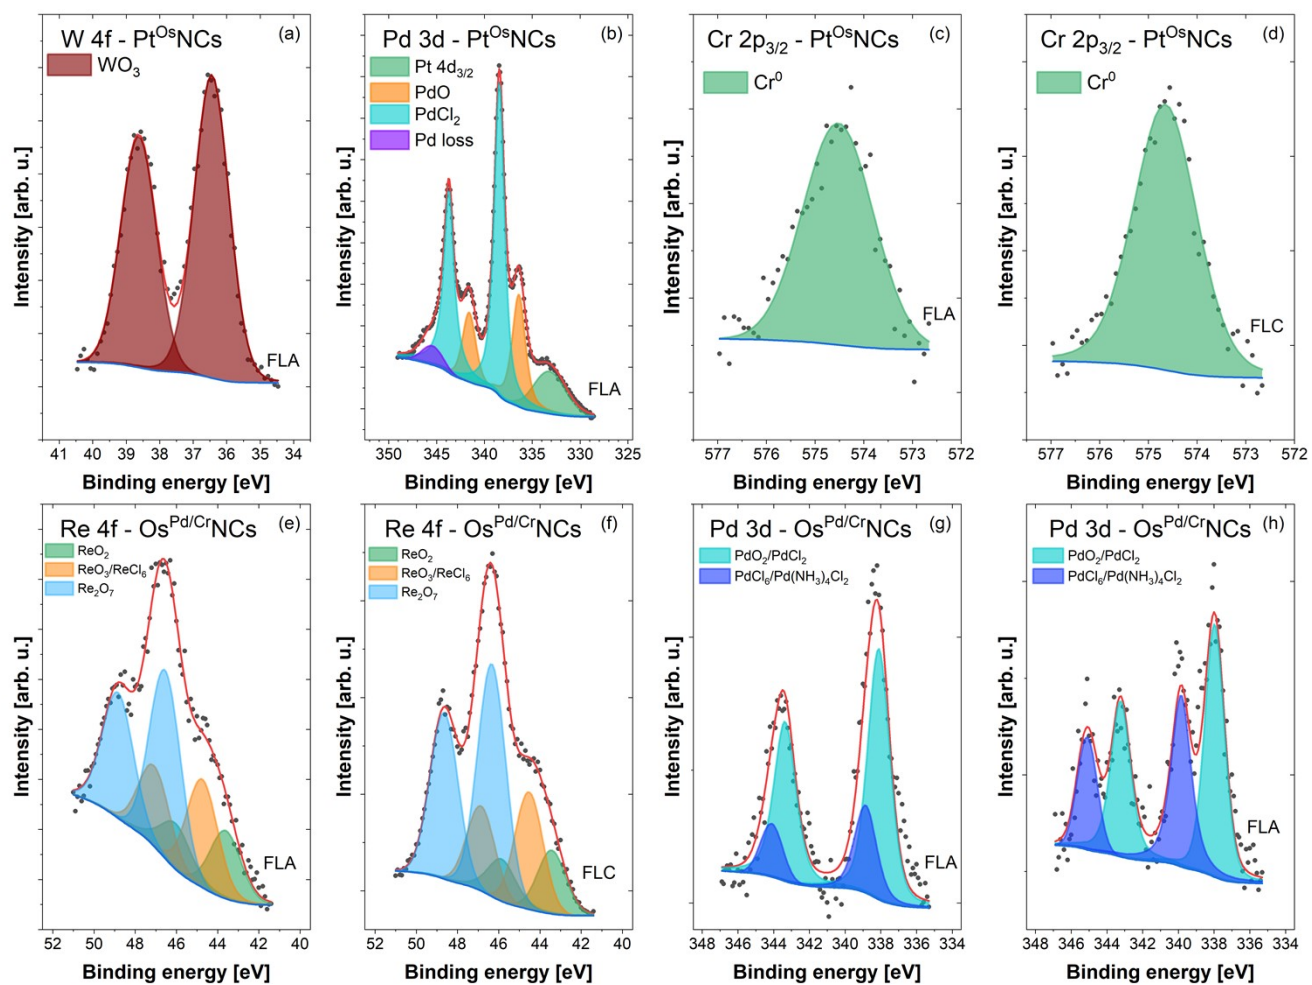

252

253 **Figure S7.** High-resolution XPS spectra of the main core level lines in the Pt<sup>0</sup>sNCs (a,b,c,d) and Os<sup>Pd/Cr</sup>NCs (e,f,g,h) samples.

254 **Table S4.** Surface compositions (atomic %) determined by fitting XPS spectra for Pt<sup>0s</sup>NCs synthesized by FLA-dc-APGD and FLC-dc-APGD.

| Element                                              | C     |                      |                | N             |                              | O                | Cl                                       | Cr              | Pd    |                   |                    | W       | Pt                    |
|------------------------------------------------------|-------|----------------------|----------------|---------------|------------------------------|------------------|------------------------------------------|-----------------|-------|-------------------|--------------------|---------|-----------------------|
| <b>Energy [eV]</b>                                   | 285.0 | 286.7                | 289.1          | 400.3         | 402.3                        | 533.3            | 199.8                                    | 574.6           | 336.4 | 338.5             | 345.6              | 36.5    | 73.4                  |
| <b>Chemical species</b>                              | C-C   | C-O-C<br>C-OH<br>C-N | O=C-O<br>N-C=O | N-C.<br>N-C=O | NH <sub>4</sub> <sup>+</sup> | O-Me.<br>O=C/O-C | Cl-<br>in e.g.<br>PdCl/PtCl <sub>2</sub> | Cr <sup>0</sup> | PdO   | PdCl <sub>2</sub> | Pd <sub>loss</sub> | WO<br>3 | PtO/PtCl <sub>2</sub> |
| <b>Pt<sup>0s</sup>NCs synthesized by FLA-dc-APGD</b> | 28.7  | 6.1                  | 2.0            | 0.4           | 1.9                          | 12.8             | 27.9                                     | 1.4             | 3.4   | 8.5               | 0.5                | 0.7     | 5.8                   |
| <b>Pt<sup>0s</sup>NCs synthesized by FLC-dc-APGD</b> | 33.4  | 8.5                  | 3.3            | 0.6           | 0.7                          | 11.1             | 25.2                                     | 1.7             | 0.0   | 0.0               | 0.0                | 0.0     | 15.6                  |

255

256 **Table S5.** Surface compositions (atomic %) determined by fitting XPS spectra for Os<sup>Pd/Cr</sup>NiCs synthesized by FLA-dc-APGD and FLC-dc-APGD.

| Element                                             | C     |            |                | N            |                              | O                                     | Mg                                          | Si              |                  | P                             | Cl                                                                                                           | Ca                                          | Pd                                      |                                                                          | Re               |                                         |                                | Os                                      |
|-----------------------------------------------------|-------|------------|----------------|--------------|------------------------------|---------------------------------------|---------------------------------------------|-----------------|------------------|-------------------------------|--------------------------------------------------------------------------------------------------------------|---------------------------------------------|-----------------------------------------|--------------------------------------------------------------------------|------------------|-----------------------------------------|--------------------------------|-----------------------------------------|
| Energy [eV]                                         | 285.0 | 286.7      | 289.3          | 400.4        | 402.3                        | 532.6                                 | 1304.3                                      | 99.3            | 103.1            | 133.7                         | 198.6                                                                                                        | 348.2                                       | 338                                     | 339.8                                                                    | 43.5             | 44.6                                    | 46.4                           | 53.6                                    |
| Chemical species                                    | C-C   | C-O<br>C-N | O=C-O<br>N-C=O | N-C<br>N-C=O | NH <sub>4</sub> <sup>+</sup> | O-Si. O-P<br>O-Re.<br>O-Pd<br>O=C/O-C | Mg <sup>2+</sup><br>in<br>MgCl <sub>2</sub> | Si <sup>0</sup> | SiO <sub>2</sub> | PO <sub>4</sub> <sup>3-</sup> | Cl <sup>-</sup> in<br>MgCl <sub>2</sub> .<br>OsCl <sub>3</sub> .<br>CaCl <sub>2</sub> .<br>PdCl <sub>2</sub> | Ca <sup>2+</sup><br>in<br>CaCl <sub>2</sub> | PdO <sub>2</sub> /<br>PdCl <sub>2</sub> | PdCl <sub>6</sub> /<br>Pd(NH <sub>3</sub> ) <sub>4</sub> Cl <sub>2</sub> | ReO <sub>2</sub> | ReO <sub>3</sub> /<br>ReCl <sub>6</sub> | Re <sub>2</sub> O <sub>7</sub> | OsCl <sub>3</sub> /<br>OsO <sub>2</sub> |
| Os <sup>Pd/Cr</sup> NiCs synthesized by FLA-dc-APGD | 14.1  | 4.4        | 0.9            | 1.2          | 2.1                          | 34.9                                  | 1.7                                         | 21.6            | 7.8              | 2.8                           | 6.5                                                                                                          | 0.2                                         | 0.7                                     | 0.2                                                                      | 0.08             | 0.13                                    | 0.22                           | 0.60                                    |
| Os <sup>Pd/Cr</sup> NiCs synthesized by FLC-dc-APGD | 24.3  | 14.7       | 5.5            | 3.5          | 3.1                          | 30.9                                  | 1.3                                         | 2.8             | 4.8              | 0.4                           | 6.5                                                                                                          | 0.0                                         | 0.4                                     | 0.3                                                                      | 0.19             | 0.33                                    | 0.66                           | 0.43                                    |

257

258 **Table S6.** Surface compositions (atomic %) determined by fitting XPS spectra for Ru<sup>W</sup>NCS synthesized by FLA-dc-APGD and FLC-dc-APGD.

| Element                                             | C           |              |           | N     |                              | O           |                   | Si              |                  | Cl                                           |                                              |                    | Ru                                      |                   |
|-----------------------------------------------------|-------------|--------------|-----------|-------|------------------------------|-------------|-------------------|-----------------|------------------|----------------------------------------------|----------------------------------------------|--------------------|-----------------------------------------|-------------------|
|                                                     | Energy [eV] | 285.0        | 288.0     | 290.7 | 400.1                        | 401.7       | 531.3             | 533.1           | 99.8             | 103.6                                        | 197.9                                        | 198.9              | 200.2                                   | 463.8             |
| <b>Chemical species</b>                             | C-C         | C=O<br>O-C-O | O-(C=O)-O | N-C   | NH <sub>4</sub> <sup>+</sup> | O-Ru<br>O=C | O-Si<br>O-C<br>OH | Si <sup>0</sup> | SiO <sub>2</sub> | Cl <sup>-</sup> in e.g.<br>RuCl <sub>2</sub> | Cl <sup>-</sup> in e.g.<br>RuCl <sub>3</sub> | C <sub>x</sub> -Cl | RuCl <sub>2</sub> /<br>RuO <sub>2</sub> | RuCl <sub>3</sub> |
| <b>Ru<sup>W</sup>NCS synthesized by FLA-dc-APGD</b> | 37.4        | 7.3          | 2.1       | 0.8   | 1.0                          | 6.8         | 16.4              | 0.0             | 3.9              | 6.1                                          | 7.9                                          | 1.4                | 7.6                                     | 1.4               |
| <b>Ru<sup>W</sup>NCS synthesized by FLC-dc-APGD</b> | 34.8        | 7.2          | 1.3       | 0.9   | 0.9                          | 4.7         | 24.9              | 1.3             | 8.4              | 4.5                                          | 4.5                                          | 1.3                | 4.4                                     | 1.0               |

259

260

261 **Table S7.** Surface compositions (atomic %) determined by fitting XPS spectra for W<sup>Ru/Os</sup>NCs synthesized by FLC-dc-APGD.

| Element                                           | C     |       |       |       | N     | O                             |       | Na                              | S                                | Cl                 |                 | W               |
|---------------------------------------------------|-------|-------|-------|-------|-------|-------------------------------|-------|---------------------------------|----------------------------------|--------------------|-----------------|-----------------|
| Energy [eV]                                       | 285.0 | 286.2 | 287.9 | 289.3 | 398.9 | 531.0                         | 532.4 | 1072.1                          | 168.8                            | 198.7              | 200.2           | 35.5            |
| Chemical species                                  |       | C-OH  |       |       |       |                               |       | Na <sup>+</sup>                 | SO <sub>4</sub> <sup>2-</sup> in | Cl <sup>-</sup> in |                 |                 |
|                                                   | C-C   | C-O-C | C=O   | O=C-O | N-C   | O=C                           | O-C   | in e.g. NaCl                    | e.g.                             | e.g.               | C-              | W <sup>6+</sup> |
|                                                   |       | C-N   |       |       |       | SO <sub>4</sub> <sup>2-</sup> | OH    | Na <sub>2</sub> SO <sub>4</sub> | Na <sub>2</sub> SO <sub>4</sub>  | NaCl               | Cl <sub>3</sub> |                 |
|                                                   |       | C-Cl  |       |       |       |                               |       |                                 |                                  |                    |                 |                 |
| W <sup>Ru/Os</sup> NCs synthesized by FLC-dc-APGD | 13.9  | 4.5   | 2.2   | 1.7   | 0.4   | 3.4                           | 2.1   | 41.8                            | 0.3                              | 21.1               | 8.4             | 0.3             |

262

263 **Table S8.** Surface compositions (atomic %) determined by fitting XPS spectra for Re<sup>Os</sup>NCs synthesized by FLA-dc-APGD.

| Element                                         | C     |       |       |       | N     | O                             |       | Na                              | S                                | Cl                 |                 | W               |
|-------------------------------------------------|-------|-------|-------|-------|-------|-------------------------------|-------|---------------------------------|----------------------------------|--------------------|-----------------|-----------------|
| Energy [eV]                                     | 285.0 | 286.2 | 287.9 | 289.3 | 398.9 | 531.0                         | 532.4 | 1072.1                          | 168.8                            | 198.7              | 200.2           | 35.5            |
| Chemical species                                |       | C-OH  |       |       |       |                               |       | Na <sup>+</sup>                 | SO <sub>4</sub> <sup>2-</sup> in | Cl <sup>-</sup> in |                 |                 |
|                                                 | C-C   | C-O-C | C=O   | O=C-O | N-C   | O=C                           | O-C   | in e.g. NaCl                    | e.g.                             | e.g.               | C-              | W <sup>6+</sup> |
|                                                 |       | C-N   |       |       |       | SO <sub>4</sub> <sup>2-</sup> | OH    | Na <sub>2</sub> SO <sub>4</sub> | Na <sub>2</sub> SO <sub>4</sub>  | NaCl               | Cl <sub>3</sub> |                 |
|                                                 |       | C-Cl  |       |       |       |                               |       |                                 |                                  |                    |                 |                 |
| Re <sup>Os</sup> NCs synthesized by FLA-dc-APGD | 13.8  | 6.2   | 1.8   | 1.5   | 0.3   | 2.0                           | 2.5   | 41.5                            | 0.5                              | 22.7               | 7.2             | 0.0             |

## 265 **References**

- 266 1 M. A. Khan, P. Cyganowski, P. Pohl, P. Jamroz, W. Tylus, A. Motyka-Pomagruk and A.  
267 Dzimitrowicz, *Colloids Surf. A Physicochem. Eng. Asp.*, 2024, **695**, 134190.
- 268 2 M. Müller, M. Dworschak, J. Benedikt and L. Kienle, *Particle & Particle Systems*  
269 *Characterization*, 2024, **41**, 2400037.
- 270 3 M. Dworschak, N. Kohlmann, F. Matějka, P. Galář, L. Kienle, J. Schäfer and J. Benedikt,  
271 *Plasma Processes and Polymers*, 2023, **20**, 2200129.
- 272 4 M. Cui, F. Wang, W. Zhao, D. Zhang, R. Liang, Q. Ou and S. Zhang, *Chemical*  
273 *Engineering Journal*, 2023, **460**, 141676.
- 274 5 A. Pitto-Barry, L. M. A. Perdigao, M. Walker, J. Lawrence, G. Costantini, P. J. Sadler  
275 and N. P. E. Barry, *Dalton Transactions*, 2015, **44**, 20308–20311.
- 276 6 E. S. Gnanakumar, W. Ng, B. Coşkuner Filiz, G. Rothenberg, S. Wang, H. Xu, L. Pastor-  
277 Pérez, M. M. Pastor-Blas, A. Sepúlveda-Escribano, N. Yan and N. R. Shiju,  
278 *ChemCatChem*, 2017, **9**, 4159–4163.
- 279 7 A. M. Ahadi, A. Hinz, O. Polonskyi, T. Trottenberg, T. Strunskus, H. Kersten and F.  
280 Faupel, *Journal of Vacuum Science & Technology A: Vacuum, Surfaces, and Films*,  
281 2016, **34**, 021301.
- 282 8 V. Vekselman, Y. Raitses and M. N. Shneider, *Phys. Rev. E*, 2019, **99**, 063205.
- 283 9 S. M. Kim, G. S. Kim and S. Y. Lee, *Mater. Lett.*, 2008, **62**, 4354–4356.
- 284 10 S. Kohsakowski, F. Seiser, J. P. Wiederrecht, S. Reichenberger, T. Vinnay, S.  
285 Barcikowski and G. Marzun, *Nanotechnology*, 2019, **31**, 095603.
- 286 11 V. R. Chelli and A. K. Golder, *Journal of Chemical Technology and Biotechnology*,  
287 2019, **94**, 911–918.
- 288 12 W. N. El-Sayed, J. Alkabli, R. F. M. Elshaarawy and Y. A. Hassan, *Arabian Journal of*  
289 *Chemistry*, 2024, **17**, 105655.
- 290 13 D. V. Francis, T. Aiswarya and T. Gokhale, *Heliyon*, 2022, **8**, e10640.
- 291 14 A. Sonawane, M. A. Mujawar and S. Bhansali, *Nanotechnology*, 2020, **31**, 365706.
- 292 15 J. D. Clogston and A. K. Patri, *Methods in Molecular Biology*, 2011, **697**, 63–70.

- 293 16 K. H. Santos, J. A. Ferreira, D. Osiro, R. A. de Carvalho, L. Alberto Colnago, C. Alves  
294 Júnior and E. Maria de Jesus Agnolon Pallone, *Appl. Surf. Sci.*, 2020, **531**, 147206.
- 295 17 Y. Zhao, A. Tao, Z. Chen, Y. Ruan, K. Wang, L. Zhu and L. Chen, *Plasma Science and*  
296 *Technology*, 2025, **27**, 035505.
- 297 18 N. A. Sirotkin, A. V. Khlyustova, V. A. Titov, A. S. Krayev, D. I. Nikitin, O. A.  
298 Dmitrieva and A. V. Agafonov, *Plasma Chemistry and Plasma Processing*, 2020, **40**,  
299 571–587.
- 300 19 K. S. Wong, N. S. L. Chew, M. Low and M. K. Tan, *Processes*, 2023, **11**, 2213.
- 301 20 M. Zhianmanesh, A. Gilmour, M. M. M. Bilek and B. Akhavan, *Appl. Phys. Rev.*, 2023,  
302 **10**, 21301.
- 303
- 304
